# Supplementary material for: Ginsenoside CK, rather than Rb1, possesses potential chemopreventive activities in human gastric cancer via regulating PI3K/AKT/NF-κB signal pathway
Source: Front Pharmacol. 2022 Sep 29;13:977539. doi: 10.3389/fphar.2022.977539 (PMC9556731; doi:10.3389/fphar.2022.977539)
Supplement: Supplementary file 2 [file DataSheet3.XLSX]

## Sheet: Sheet1
RB1 target	CK	gastric cancer target			RB1 gastric cancerPPI core target	CK gastric cancer PPI core target
AHSA1	NFKBIA	SDHB			NTRK1	HNRNPU		#N/A
PLAT	MAP2K4	PLA2G2A			FN1	AURKA		#N/A
NGF		EPHB2			CUL3	APP		#N/A
IL1B		MUTYH			MCM2	MAP2K4		#N/A
FN1		RAD54L			ESR1	IKBKB		#N/A
CYP1A1		BCAR3			ITGA4	SRC		#N/A
SERPINE1		NRAS			TP53	MAP3K7		TP53
PRKCB		SDHC			VCAM1	AKT1		#N/A
BCL2		FASLG			CDK2	RPS27A		#N/A
MAPT		RNASEL			EGFR	CHUK		EGFR
VEGFA		FH			APP	UBE2I		APP
VCAM1		EPCAM			COPS5	MAP3K1		#N/A
NFKBIA		MSH2			UBC	VCP		UBC
NOS3		MSH6			CUL1	TUBB		CUL1
AHR		EHBP1			XPO1	XPO1		XPO1
MAPK8		BUB1			CAND1	UBC		#N/A
GSK3B		IL1B			YWHAZ	ARRB2		#N/A
IRAK1		IL1RN			SIRT7	TP53		#N/A
CDK5		DIRC1			NPM1	JUN		#N/A
CDK5R1		CASP10			HSP90AA1	MAP3K3		#N/A
ESR2		CASP8			CCDC8	BTRC		#N/A
NLRP3		BARD1			TRAF6	IKBKG		#N/A
		TGFBR2			FBXO6	CUL1		#N/A
		MLH1			HUWE1	NFKBIA		#N/A
		DLEC1			HDAC5	NFKB1		#N/A
		CTNNB1			HNRNPU	EGFR		HNRNPU
		RABL3			VCP	RELA		VCP
		ATR			BRCA1	HSPA4		#N/A
		PIK3CA			HNRNPA1	HSPA5		#N/A
		EIF4G1			GRB2	HSPA8		#N/A
		FGFR3			GSK3B			#N/A
		ADH1B			HSP90AB1			#N/A
		TLR2			MYC			#N/A
		PALLD			VHL			#N/A
		DAB2			EP300			#N/A
		APC			YWHAQ			#N/A
		MCC			HSPA5			HSPA5
		IRF1			EEF1A1			#N/A
		HMMR			FUS			#N/A
		FGFR4			EWSR1			#N/A
		NQO2			HDAC1			#N/A
		PBOV1			MDM2			#N/A
		SASH1			IKBKG			IKBKG
		ESR1			AKT1			AKT1
		PRKN			CTNNB1			#N/A
		MAD1L1
		PMS2
		EGFR
		VOPP1
		PTPN12
		BRAF
		DLC1
		PDGFRL
		RB1CC1
		RAD54B
		CDKN2A
		FOXE1
		GALNT12
		SCAI
		KLF6
		MAP3K8
		MSMB
		ERCC6
		SNCG
		PTEN
		LIPF
		MXI1
		HABP2
		CASC2
		FGFR2
		HRAS
		MUC6
		MUC5AC
		PTPRJ
		CBLIF
		CCND1
		CTTN
		GCRG224
		ATM
		COLCA1
		COLCA2
		PPP2R1B
		SDHD
		HEPN1
		OPCML
		KRAS
		ACVR1B
		SRGAP1
		ALDH2
		CDK2AP1
		POLE
		BRCA2
		RB1
		NKX2-1
		MLH3
		XRCC3
		AKT1
		BUB1B
		RAD51
		CHRNA5
		CHRNA3
		IQGAP1
		PALB2
		CDH1
		NQO1
		ZFHX3
		HIC1
		TP53
		ELAC2
		FLCN
		RAD51D
		ERBB2
		BRCA1
		HOXB13
		GIP
		PHB
		MPO
		RNF43
		RAD51C
		PPM1D
		BRIP1
		AXIN2
		RHBDF2
		SMAD7
		SMAD4
		DCC
		STK11
		CYP2A6
		GIPR
		BAX
		POLD1
		SRC
		BLCAP
		NCOA3
		AURKA
		TFF1
		HIC2
		CHEK2
		EP300
		AR
		MIR21
		MIR221
		MIR25
		MIR145
		MIR20A
		MIR27A
		MIR143
		MIR215
		MIR222
		MIR34A
		MIR106B
		MIR93
		MIR141
		MIR196B
		MIR122
		MIR192
		MIR200C
		MIR15B
		MIR203A
		MIR150
		MIR451A
		ABO
		ARHGAP24
		CDKN1A
		CDKN1B
		CIB1
		COL1A2
		CYP1A1
		CYP4F3
		ERCC1
		EZH2
		FUT3
		GAST
		GSTK1
		GSTM1
		HPGDS
		IFNA1
		IFNA13
		IL32
		MCM7
		POSTN
		PPIG
		PSCA
		SFRP1
		SLC12A9
		SLCO6A1
		TGFA
		TLR4
		TP73
